# Supplementary material for: Automated Cancer Diagnostics via Analysis of Optical and Chemical Images by Deep and Shallow Learning
Source: MDPI journal article supplement (doi:10.3390/metabo12050455), 2022-05-18
Supplement: s1 [file s1]

## Supplementary:

*Supplementary Table S1: Instrumental parameters for DESI-MSI*

| Parameters                  | Xevo G2-XS QTOF (Waters Corporation, Milford, MA, USA) |
|-----------------------------|--------------------------------------------------------|
| Scan time                   | 1 second                                               |
| Scan mode                   | Sensitivity                                            |
| Mass analyser               | TOF                                                    |
| Mass range                  | 50 – 1000 m/z                                          |
| Solvent flow rate           | 1.5 µl/min                                             |
| Spray voltage               | 4.5 kV                                                 |
| Gas inlet pressure          | 7 bar                                                  |
| Sprayer-to-surface distance | 2 mm                                                   |
| Sprayer-to-inlet distance   | 10 mm                                                  |
| Sprayer incidence angle     | 75°                                                    |
| Pixel size                  | 85 µm <sup>2</sup>                                     |
| Source temperature          | 120 °C                                                 |
| Ion mode                    | Negative                                               |
| Sampling cone voltage       | -40 V                                                  |
| Source offset               | -80 V                                                  |

Supplementary Table S2: **Model performance.** In order to classify a core as tumour, different thresholds on the minimum number of positive pixels within the core were used. Only the core with a positive pixel number above the chosen threshold were classified as tumour. The table reports the number of true positive (tp), true negative (tn), false positive (fp), false negative (fn), together with the true positive rate (TPR), false positive rate (FPR), true negative rate (TNR), accuracy (ACC) and F1-Score (F1).

| Threshold area | tp  | tn | fp | fn  | TPR  | FPR  | TNR  | ACC  | F1   |
|----------------|-----|----|----|-----|------|------|------|------|------|
| 0              | 551 | 7  | 66 | 3   | 0.99 | 0.9  | 0.1  | 0.89 | 0.94 |
| 100            | 528 | 37 | 36 | 26  | 0.95 | 0.49 | 0.51 | 0.9  | 0.94 |
| 200            | 506 | 47 | 26 | 48  | 0.91 | 0.36 | 0.64 | 0.88 | 0.93 |
| 300            | 472 | 54 | 19 | 82  | 0.85 | 0.26 | 0.74 | 0.84 | 0.9  |
| 400            | 433 | 58 | 15 | 121 | 0.78 | 0.21 | 0.79 | 0.78 | 0.86 |
| 500            | 400 | 62 | 11 | 154 | 0.72 | 0.15 | 0.85 | 0.74 | 0.83 |
| 600            | 369 | 68 | 5  | 185 | 0.67 | 0.07 | 0.93 | 0.7  | 0.8  |
| 700            | 337 | 69 | 4  | 217 | 0.61 | 0.05 | 0.95 | 0.65 | 0.75 |
| 800            | 302 | 71 | 2  | 252 | 0.55 | 0.03 | 0.97 | 0.59 | 0.7  |
| 900            | 264 | 71 | 2  | 290 | 0.48 | 0.03 | 0.97 | 0.53 | 0.64 |
| 1000           | 232 | 72 | 1  | 322 | 0.42 | 0.01 | 0.99 | 0.48 | 0.59 |
| 1200           | 133 | 73 | 0  | 421 | 0.24 | 0.0  | 1.0  | 0.33 | 0.39 |
| 1400           | 70  | 73 | 0  | 484 | 0.13 | 0.0  | 1.0  | 0.23 | 0.22 |
| 1600           | 28  | 73 | 0  | 526 | 0.05 | 0.0  | 1.0  | 0.16 | 0.1  |
| 1800           | 14  | 73 | 0  | 540 | 0.03 | 0.0  | 1.0  | 0.14 | 0.05 |
| 2000           | 7   | 73 | 0  | 547 | 0.01 | 0.0  | 1.0  | 0.13 | 0.02 |
| 2200           | 2   | 73 | 0  | 552 | 0.0  | 0.0  | 1.0  | 0.12 | 0.01 |
| 2400           | 2   | 73 | 0  | 552 | 0.0  | 0.0  | 1.0  | 0.12 | 0.01 |
| 2600           | 0   | 73 | 0  | 554 | 0.0  | 0.0  | 1.0  | 0.12 | 0.0  |
| 2800           | 0   | 73 | 0  | 554 | 0.0  | 0.0  | 1.0  | 0.12 | 0.0  |
| 3000           | 0   | 73 | 0  | 554 | 0.0  | 0.0  | 1.0  | 0.12 | 0.0  |
| 3200           | 0   | 73 | 0  | 554 | 0.0  | 0.0  | 1.0  | 0.12 | 0.0  |
| 3400           | 0   | 73 | 0  | 554 | 0.0  | 0.0  | 1.0  | 0.12 | 0.0  |
| 3600           | 0   | 73 | 0  | 554 | 0.0  | 0.0  | 1.0  | 0.12 | 0.0  |
| 3800           | 0   | 73 | 0  | 554 | 0.0  | 0.0  | 1.0  | 0.12 | 0.0  |
| 4000           | 0   | 73 | 0  | 554 | 0.0  | 0.0  | 1.0  | 0.12 | 0.0  |
| 4200           | 0   | 73 | 0  | 554 | 0.0  | 0.0  | 1.0  | 0.12 | 0.0  |
| 4400           | 0   | 73 | 0  | 554 | 0.0  | 0.0  | 1.0  | 0.12 | 0.0  |
| 4600           | 0   | 73 | 0  | 554 | 0.0  | 0.0  | 1.0  | 0.12 | 0.0  |
| 4800           | 0   | 73 | 0  | 554 | 0.0  | 0.0  | 1.0  | 0.12 | 0.0  |
| 5000           | 0   | 73 | 0  | 554 | 0.0  | 0.0  | 1.0  | 0.12 | 0.0  |

Supplementary Table S3: Features of interest in FFPE breast TMAs.<sup>1</sup>

| Experimental m/z | Theoretical m/z | Ppm   | Adduct   | Chemical formula | Tentative annotations                                     |
|------------------|-----------------|-------|----------|------------------|-----------------------------------------------------------|
| 134.0467         | 134.0472        | 3.8   | M-H-     | C5H5N5           | Adenine                                                   |
| 135.0452         | 135.0452        | -0.2  | M-H-     | C8H8O2           | Phenylacetic acid                                         |
| 152.0028         | 152.0023        | -3.4  | M-H-     | C3H7NO4S         | 3-Sulfinoalanine                                          |
| 157.0870         | 157.087         | -0.6  | M-H-     | C8H14O3          | 3-Oxoocanoic acid                                         |
| 166.0150         | 166.0146        | -2.2  | M-H-     | C7H5NO4          | 4-Nitrobenzoic acid                                       |
| 177.0915         | 177.0921        | 3.6   | M-H-     | C11H14O2         | 5-Phenylvaleric acid                                      |
| 183.1384         | 183.1391        | 3.7   | M-H-     | C11H20O2         | Undecylenic acid                                          |
| 185.1176         | 185.1183        | 4.1   | M-H-     | C10H18O3         | 10-Hydroxy-2-decenoic acid                                |
| 185.1541         | 185.1547        | 3.0   | M-H-     | C11H22O2         | Undecanoic acid                                           |
| 197.1182         | 197.1178        | -1.9  | M-H2O-H- | C11H20O4         | Undecanedioic acid                                        |
| 199.1337         | 199.1340        | 1.7   | M-H-     | C11H20O3         | 9-Undecenoic acid, 11-hydroxy-, (9Z)-                     |
| 211.1337         | 211.1334        | -1.4  | M-H2O-H- | C12H22O4         | Dodecanedioic acid                                        |
| 213.1856         | 213.1860        | 1.9   | M-H-     | C13H26O2         | Tridecanoic acid                                          |
| 228.2049         | -               | -     | -        | -                | -                                                         |
| 241.2171         | 241.2173        | 0.9   | M-H-     | C15H30O2         | Pentadecanoic acid                                        |
| 250.1434         | -               | -     | -        | -                | -                                                         |
| 267.1974         | 267.1960        | -5.1  | M-H2O-H- | C16H30O4         | Hexadecanedioic acid                                      |
| 269.2126         | 269.2122        | -1.5  | M-H-     | C16H30O3         | 3-Oxohexadecanoic acid                                    |
| 269.2485         | 269.2486        | 0.4   | M-H-     | C17H34O2         | Heptadecanoic acid                                        |
| 271.2278         | 271.2279        | 0.5   | M-H-     | C16H32O3         | 2-Hydroxyhexadecanoic acid                                |
| 275.1295         | 275.1283        | -4.5  | M-H2O-H- | C16H22O5         | -                                                         |
| 283.1128         | 283.1131        | -1.1  | M-H-     | C21H16O          | -                                                         |
| 299.2565         | 299.2592        | 9.1   | M-H-     | C18H36O3         | 13-Hydroxyoctadecanoic acid                               |
| 301.1439         | 301.1445        | 1.0   | M-H-     | C18H22O4         | Enterodiol                                                |
| 311.2225         | 311.2228        | 0.9   | M-H-     | C18H32O4         | 9,12-Octadecadienoic acid, 15,16-dihydroxy-, (Z,Z)- (9CI) |
| 313.2381         | 313.2384        | 0.9   | M-H-     | C18H34O4         | 12-Octadecenoic acid, 9,10-dihydroxy-, (12Z)-             |
| 315.1872         | -               | -     | -        | -                | -                                                         |
| 324.2211         | 324.218         | -9.7  | M-H-     | C18H31NO4        | -                                                         |
| 325.2743         | 325.2743        | -0.1  | M-H2O-H- | C20H40O4         | 11,12-Dihydroxyeicosanoic acid                            |
| 329.2370         | -               | -     | -        | -                | -                                                         |
| 337.2360         | 337.2379        | 5.8   | M-H2O-H- | C20H36O5         | Prostaglandin F1a                                         |
| 355.1951         | 355.1915        | -10.0 | M-H-     | C22H28O4         | -                                                         |
| 356.1709         | 356.1715        | 1.9   | M-H-     | C17H27NO7        | Uplandicine                                               |
| 363.2154         | 363.2177        | 6.3   | M-H-     | C21H32O5         | -                                                         |
| 366.2264         | -               | -     | -        | -                | -                                                         |
| 373.2031         | 373.2020        | -3.0  | M-H-     | C22H30O5         | 6α-Methylprednisolone                                     |
| 379.2463         | 379.2490        | 7.1   | M-H-     | C22H36O5         | Bisnorchoic acid                                          |
| 385.1940         | -               | -     | -        | -                | -                                                         |
| 409.2564         | -               | -     | -        | -                | -                                                         |
| 417.2063         | 417.2074        | -2.6  | M-H-     | C27H30O4         | -                                                         |
| 419.2665         | -               | -     | -        | -                | -                                                         |
| 421.3072         | -               | -     | -        | -                | -                                                         |
| 435.2552         | 435.2517        | -7.9  | M-H-     | C21H41O7P        | LPA(18:1)                                                 |
| 437.1951         | 437.1970        | 4.4   | M-H-     | C26H30O6         | -                                                         |

<sup>1</sup> To confirm the identity of certain lipid species, specifically LPI(18:0), metabolites were extracted from FFPE tissue rolls using a 2-phase method as described in Beckonert et al. (Beckonert et al., 2007). A reversed-phase chromatography lipids method was used for LC-MS analysis as described in Lewis et al. (Lewis et al., 2022) and peakpanther (Wolfer et al., 2021) was used to identify LPI(18:0).

|          |          |      |      |             |           |
|----------|----------|------|------|-------------|-----------|
| 485.2770 | -        | -    | -    | -           | -         |
| 586.1987 | 586.2020 | -5.6 | M-H- | C32H33N3O6S | -         |
| 599.3185 | 599.3202 | -2.9 | M-H- | C27H53O12P  | LPI(18:0) |
| 692.4617 | -        | -    | -    | -           | -         |

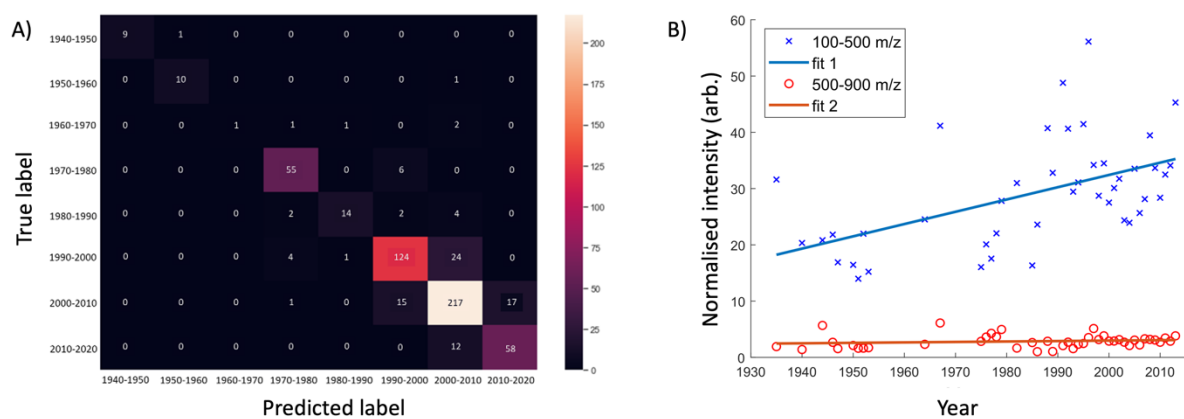

**Supplementary Figure S1: The effect of sample age on the metabolic information extracted from formalin-fixed and paraffin embedded tissue sample.** A) Confusion matrix of the LR classification model produced by cross-validating the FFPE samples with 10-year interval ranging from the years 1940-2013, comparing the predicted age (x-axis) against the true age (y-axis), with true positives appearing along the matrix diagonal. B) The mean metabolic signal intensities of FFPE samples from the years 1935 - 2013. Blue crosses correspond to the lower mass range (100-500 m/z), while red dots correspond to the higher mass range (500-900 m/z). The solid lines represent the respective linear regressions performed on the data points (Isberg et al., 2021).

## References:

- Beckonert, O., Keun, H. C., Ebbels, T. M. D., Bundy, J., Holmes, E., Lindon, J. C., & Nicholson, J. K. (2007). Metabolic profiling, metabolomic and metabonomic procedures for NMR spectroscopy of urine, plasma, serum and tissue extracts. *Nature Protocols*, 2(11), 2692–2703. <https://doi.org/10.1038/nprot.2007.376>
- Isberg, O. G., Xiang, Y., Bodvarsdottir, S. K., Jonasson, J. G., Thorsteinsdottir, M., & Takats, Z. (2021). The effect of sample age on the metabolic information extracted from formalin-fixed and paraffin embedded tissue samples using desorption electrospray ionization mass spectrometry imaging. *Journal of Mass Spectrometry and Advances in the Clinical Lab*, 22, 50–55. <https://doi.org/10.1016/j.jmsacl.2021.10.004>
- Lewis, M. R., Chekmeneva, E., Camuzeaux, S., Sands, C. J., Yuen, A. H. Y., David, M., Salam, A., Chappell, K., Cooper, B., Haggart, G. A., Maslen, L., Gómez-Romero, M., Horneffer-Van Der Sluis, V., Correia, G., & Takats, Z. (2022). An Open Platform for Large Scale LC-MS-Based Metabolomics. *ChemRxiv*.
- Wolfer, A. M., Correia, G. D. S., Sands, C. J., Camuzeaux, S., Yuen, A. H. Y., Chekmeneva, E., Takáts, Z., Pearce, J. T. M., & Lewis, M. R. (2021). peakPanther, an R package for large-scale targeted extraction and integration of annotated metabolic features in LC-MS profiling datasets. *Bioinformatics*. <https://doi.org/10.1093/bioinformatics/btab433/6298587>
